# Supplementary material
Source: PubMed Central journal article supplement (PMC156590)
Supplement: gb-2003-4-5-r34-s1.pdf [file gb-2003-4-5-r34-s1.pdf]

# Supplement to “Clustering Gene Expression Data with Repeated Measurements”

Ka Yee Yeung, Mario Medvedovic, Roger E. Bumgarner

## Results on the yeast galactose data (without imputing missing values)

In the paper, we reported results on the yeast galactose data after imputing missing values. Here, we show results on the yeast galactose data *without* imputing any missing values, i.e., we ignore the corresponding values when computing the similarity measures. Since the current implementations of the model-based approaches cannot deal with missing data values, their results are not available.

### *Cluster Accuracy: agreement with the functional categories*

Each entry shows the adjusted Rand index of the corresponding algorithm with the functional categories. The maximum adjusted Rand index of each row is shown in bold. The algorithms (rows) are sorted in descending order of the maximum adjusted Rand in each row. DIANA and single-link produce the least accurate clusters. \*CAST did not converge.

| algorithm     | sim measure | average | SD-weighted  | CV-weighted  | hierarchical | true mean    |
|---------------|-------------|---------|--------------|--------------|--------------|--------------|
| average-link  | dist        | 0.843   | 0.858        | <b>0.957</b> | 0.869        | 0.159        |
| CAST          | corr        | 0.737   | 0.815        | NA*          | NA           | <b>0.938</b> |
| complete-link | dist        | 0.695   | <b>0.937</b> | 0.928        | 0.633        | 0.438        |
| average-link  | corr        | 0.840   | 0.790        | 0.764        | 0.799        | <b>0.924</b> |
| centroid-link | dist        | 0.861   | 0.868        | <b>0.869</b> | 0.861        | 0.850        |
| k-means       | dist        | 0.843   | 0.860        | 0.821        | NA           | <b>0.861</b> |
| centroid-link | corr        | 0.833   | 0.772        | 0.176        | 0.833        | <b>0.841</b> |
| complete-link | corr        | 0.636   | 0.764        | 0.619        | 0.455        | <b>0.792</b> |
| k-means       | corr        | 0.693   | 0.678        | 0.568        | NA           | <b>0.728</b> |
| DIANA         | dist        | 0.043   | 0.137        | <b>0.162</b> | NA           | -0.156       |
| single-link   | dist        | 0.017   | 0.038        | 0.132        | <b>0.160</b> | <b>0.160</b> |
| single-link   | corr        | 0.005   | -0.009       | 0.005        | <b>0.156</b> | 0.017        |
| DIANA         | corr        | -0.059  | -0.143       | <b>0.046</b> | NA           | -0.173       |

### *Cluster Stability: with respect to synthetic re-measured data*

Each entry shows the average adjusted Rand index of the clusters on the original data with clusters from the synthetic re-measured data sets. The maximum average adjusted Rand index for each row is shown in bold. The rows are sorted in descending order of the maximum average adjusted Rand index. DIANA and single-link produced very unstable clusters.

| algorithm     | sim measure | average       | SD-weighted  | CV-weighted   | hierarchical |
|---------------|-------------|---------------|--------------|---------------|--------------|
| average-link  | dist        | 0.543         | <b>0.983</b> | 0.828         | 0.680        |
| centroid-link | dist        | 0.466         | <b>0.934</b> | 0.714         | 0.466        |
| k-means       | dist        | 0.768         | <b>0.827</b> | 0.754         | NA           |
| complete-link | dist        | 0.622         | <b>0.813</b> | 0.675         | 0.393        |
| average-link  | corr        | 0.746         | <b>0.780</b> | 0.700         | 0.765        |
| CAST          | corr        | 0.671         | <b>0.695</b> | NA*           | NA           |
| k-means       | corr        | <b>0.677</b>  | 0.674        | 0.463         | NA           |
| centroid-link | corr        | <b>0.665</b>  | 0.568        | 0.201         | <b>0.665</b> |
| complete-link | corr        | 0.591         | <b>0.620</b> | 0.509         | 0.503        |
| single-link   | dist        | 0.348         | 0.506        | 0.175         | <b>0.578</b> |
| single-link   | corr        | <b>0.252</b>  | 0.246        | 0.026         | 0.141        |
| DIANA         | dist        | <b>-0.016</b> | -0.487       | -0.318        | NA           |
| DIANA         | corr        | -0.174        | -0.291       | <b>-0.034</b> | NA           |

## Results on the yeast galactose data (after imputing missing values)

Most of the results in the following tables are shown in the main paper. Here, we added the results from single-link and DIANA. As shown in the following two tables, both single-link and DIANA produced unstable and inaccurate clusters. Comparing the results before and after imputing missing values, it is clear that clusters tend to be more accurate and more stable after the missing value imputation step.

### *Cluster Accuracy: agreement with the functional categories*

Each entry shows the adjusted Rand index of the corresponding algorithm with the functional categories. The maximum adjusted Rand index of each row is shown in bold. The algorithms (rows) are sorted in descending order of the maximum adjusted Rand in each row. DIANA and single-link produce the least accurate clusters. \*CAST did not converge.

| algorithm     | sim measure/model | average      | SD-weighted  | CV-weighted  | hierarchical | true mean    | IMM          |
|---------------|-------------------|--------------|--------------|--------------|--------------|--------------|--------------|
| centroid-link | dist              | <b>0.968</b> | 0.849        | 0.802        | <b>0.968</b> | 0.159        | NA           |
| MCLUST        | NA                | <b>0.968</b> | NA           | NA           | <b>0.968</b> | 0.806        | NA           |
| complete-link | dist              | 0.957        | <b>0.968</b> | 0.957        | 0.643        | 0.695        | NA           |
| complete-link | spherical         | NA           | NA           | NA           | NA           | NA           | <b>0.968</b> |
| complete-link | elliptical        | NA           | NA           | NA           | NA           | NA           | <b>0.968</b> |
| centroid-link | corr              | <b>0.942</b> | 0.807        | 0.753        | <b>0.942</b> | <b>0.942</b> | NA           |
| CAST          | corr              | 0.881        | 0.682        | NA*          | NA           | <b>0.898</b> | NA           |
| k-means       | corr              | 0.871        | 0.640        | 0.827        | NA           | <b>0.897</b> | NA           |
| average-link  | spherical         | NA           | NA           | NA           | NA           | NA           | 0.897        |
| average-link  | elliptical        | NA           | NA           | NA           | NA           | NA           | 0.897        |
| average-link  | dist              | 0.858        | 0.858        | 0.847        | <b>0.869</b> | 0.159        | NA           |
| average-link  | corr              | <b>0.866</b> | 0.817        | 0.841        | 0.865        | 0.857        | NA           |
| k-means       | dist              | <b>0.857</b> | <b>0.857</b> | 0.767        | NA           | 0.159        | NA           |
| single-link   | dist              | <b>0.850</b> | 0.144        | 0.194        | 0.160        | 0.017        | NA           |
| single-link   | corr              | <b>0.748</b> | -0.011       | 0.005        | 0.172        | 0.017        | NA           |
| complete-link | corr              | 0.677        | 0.724        | 0.730        | 0.503        | <b>0.744</b> | NA           |
| DIANA         | dist              | 0.044        | 0.098        | <b>0.388</b> | NA           | -0.100       | NA           |
| DIANA         | corr              | 0.142        | <b>0.269</b> | -0.156       | NA           | -0.114       | NA           |

### *Cluster Stability: with respect to synthetic re-measured data*

Each entry shows the average adjusted Rand index of the clusters on the original data with clusters from the synthetic re-measured data sets. The maximum average adjusted Rand index for each row is shown in bold. The rows are sorted in descending order of the maximum average adjusted Rand index. DIANA and single-link produced very unstable clusters.

| algorithm     | sim measure/model | average       | SD-weighted  | CV-weighted  | hierarchical | IMM          |
|---------------|-------------------|---------------|--------------|--------------|--------------|--------------|
| complete-link | elliptical        | NA            | NA           | NA           | NA           | <b>0.998</b> |
| complete-link | spherical         | NA            | NA           | NA           | NA           | <b>0.991</b> |
| average-link  | dist              | 0.820         | <b>0.985</b> | 0.914        | 0.650        | NA           |
| MCLUST        | NA                | <b>0.963</b>  | NA           | NA           | 0.916        | NA           |
| complete-link | dist              | 0.927         | <b>0.937</b> | 0.830        | 0.441        | NA           |
| centroid-link | dist              | 0.893         | <b>0.924</b> | 0.841        | 0.893        | NA           |
| average-link  | spherical         | NA            | NA           | NA           | NA           | <b>0.923</b> |
| k-means       | dist              | <b>0.905</b>  | 0.867        | 0.798        | NA           | NA           |
| average-link  | elliptical        | NA            | NA           | NA           | NA           | <b>0.895</b> |
| centroid-link | corr              | <b>0.889</b>  | 0.758        | 0.644        | <b>0.889</b> | NA           |
| average-link  | corr              | 0.842         | 0.842        | <b>0.855</b> | 0.828        | NA           |
| k-means       | corr              | <b>0.799</b>  | 0.709        | 0.781        | NA           | NA           |
| CAST          | corr              | <b>0.756</b>  | 0.714        | NA*          | NA           | NA           |
| complete-link | corr              | 0.655         | <b>0.700</b> | 0.666        | 0.577        | NA           |
| single-link   | dist              | 0.12          | <b>0.606</b> | 0.256        | 0.518        | NA           |
| single-link   | corr              | 0.054         | <b>0.307</b> | 0.164        | 0.161        | NA           |
| DIANA         | dist              | <b>-0.016</b> | -0.612       | -0.335       | NA           | NA           |
| DIANA         | corr              | <b>-0.061</b> | -0.232       | -0.292       | NA           | NA           |

### Synthetic Data: randomly resampled yeast galactose data

We complement our empirical study with another set of synthetic data. We modified the randomly resampled approach in [1] to incorporate repeated measurements on the yeast galactose data.

- For each experiment  $j$  (where  $j = 1, \dots, E$ ), estimate the true mean intensity levels  $(\mu_{x_{ij}}, \mu_{y_{ij}})$  for each gene  $i$ , and the gene-independent parameters  $(\sigma_{\epsilon_{xj}}, \sigma_{\epsilon_{yj}}, \rho_{\epsilon_j}, \sigma_{\delta_{xj}}, \sigma_{\delta_{yj}}, \rho_{\delta_j})$ .
- To generate the  $r$ th random repeated measurement for gene  $i$  in experiment  $j$  and class  $c$ , where  $i = 1, \dots, 205$ ,  $j=1, \dots, 20$ ,  $r= 1, \dots, 4$ :
  - Randomly sample with replacement the estimated true mean intensity levels under the same experiment  $j$  in the same class  $c$  from the yeast galactose data. Let the randomly sampled estimated true mean intensities be  $(\mu_{x_{ij}}, \mu_{y_{ij}})$ .
  - Generate a random replicate observation using  $(\mu_{x_{ij}}, \mu_{y_{ij}})$  and the gene-independent parameters estimated in Step 1. Let the random observation be  $(x_{ij}^r, y_{ij}^r)$ . The log ratio for this observation is

$$\log \frac{x_{ij}^r}{y_{ij}^r}.$$

The size of each class in this synthetic data set is the same as in the real yeast galactose data. Due to independent random sampling from each experiment, any possible correlation between experiments is lost. Using this method, we generated synthetic data with  $R = 4, 10, \text{ or } 100$  repeated measurements from the yeast galactose data.

### Results on randomly resampled synthetic yeast galactose data (without imputing missing values)

The results from the model-based approaches (MCLUST and IMM) are not available because the current implementations do not handle missing values.

#### Cluster Accuracy: agreement with the 4 classes

Each entry shows the adjusted Rand index of the corresponding algorithm with the 4 classes. The maximum adjusted Rand index of each row is shown in bold. The algorithms (rows) are sorted in descending order of the maximum adjusted Rand in each row. DIANA and single-link produced the least accurate clusters.

| algorithm     | sim measure | average      | SD-weighted  | CV-weighted   | hierarchical |
|---------------|-------------|--------------|--------------|---------------|--------------|
| average-link  | dist        | 0.788        | <b>0.912</b> | 0.858         | 0.859        |
| centroid-link | dist        | 0.573        | <b>0.908</b> | 0.806         | 0.573        |
| k-means       | dist        | 0.838        | <b>0.899</b> | 0.895         | NA           |
| complete-link | dist        | 0.717        | <b>0.890</b> | 0.709         | 0.493        |
| average-link  | corr        | 0.807        | 0.765        | 0.736         | <b>0.864</b> |
| centroid-link | corr        | <b>0.817</b> | 0.704        | 0.404         | <b>0.817</b> |
| k-means       | corr        | <b>0.711</b> | 0.674        | 0.649         | NA           |
| CAST          | corr        | <b>0.664</b> | 0.595        | 0.627         | NA           |
| complete-link | corr        | <b>0.624</b> | 0.612        | 0.588         | 0.446        |
| single-link   | dist        | 0.159        | <b>0.300</b> | 0.123         | <b>0.300</b> |
| DIANA         | dist        | 0.028        | 0.097        | <b>0.206</b>  | NA           |
| single-link   | corr        | <b>0.104</b> | -0.001       | 0.011         | 0.059        |
| DIANA         | corr        | -0.117       | -0.026       | <b>-0.018</b> | NA           |

### Cluster Stability: with respect to synthetic re-measured data

Each entry shows the average adjusted Rand index of the clusters on the original data with clusters from the synthetic re-measured data sets. The maximum average adjusted Rand index for each row is shown in bold. The rows are sorted in descending order of the maximum average adjusted Rand index. Entries marked with “-“ means that we don’t expect the results to be very interesting and didn’t run the experiment.

| algorithm     | sim measure | average      | SD-weighted  | CV-weighted | hierarchical |
|---------------|-------------|--------------|--------------|-------------|--------------|
| centroid-link | dist        | 0.661        | <b>0.945</b> | 0.823       | 0.661        |
| average-link  | dist        | 0.702        | <b>0.934</b> | 0.907       | 0.892        |
| k-means       | dist        | 0.826        | <b>0.892</b> | 0.810       | NA           |
| single-link   | dist        | 0.877        | 0.821        | -           | -            |
| average-link  | corr        | 0.783        | 0.758        | 0.712       | <b>0.863</b> |
| complete-link | dist        | 0.664        | <b>0.813</b> | 0.682       | 0.302        |
| centroid-link | corr        | <b>0.712</b> | 0.563        | 0.264       | <b>0.712</b> |
| k-means       | corr        | <b>0.681</b> | 0.668        | 0.542       | NA           |
| CAST          | corr        | 0.645        | 0.632        | -           | NA           |
| complete-link | corr        | <b>0.598</b> | 0.569        | 0.494       | 0.386        |
| single-link   | corr        | 0.113        | 0.079        | -           | -            |
| DIANA         | corr        | -0.187       | -0.209       | -           | NA           |
| DIANA         | dist        | -0.247       | -0.409       | -           | NA           |

### Results on randomly resampled synthetic yeast galactose data (after imputed missing values)

#### Cluster Accuracy: agreement with the 4 classes

Each entry shows the adjusted Rand index of the corresponding algorithm with the 4 classes. The maximum adjusted Rand index of each row is shown in bold. The algorithms (rows) are sorted in descending order of the maximum adjusted Rand in each row. DIANA and single-link produced the least accurate clusters.

| algorithm     | sim measure | average      | SD-weighted  | CV-weighted  | hierarchical |
|---------------|-------------|--------------|--------------|--------------|--------------|
| MCLUST        | NA          | 0.968        | NA           | NA           | <b>0.991</b> |
| complete-link | dist        | 0.917        | <b>0.982</b> | 0.902        | 0.524        |
| average-link  | dist        | <b>0.971</b> | 0.915        | 0.933        | 0.859        |
| k-means       | dist        | <b>0.970</b> | 0.911        | 0.903        | NA           |
| centroid-link | dist        | 0.899        | <b>0.964</b> | 0.828        | 0.899        |
| centroid-link | corr        | 0.906        | 0.875        | 0.626        | <b>0.906</b> |
| average-link  | corr        | 0.878        | 0.836        | 0.809        | <b>0.879</b> |
| k-means       | corr        | 0.774        | 0.761        | <b>0.847</b> | NA           |
| complete-link | corr        | <b>0.757</b> | 0.664        | 0.699        | 0.584        |
| single-link   | corr        | <b>0.460</b> | -0.010       | 0.008        | 0.042        |
| single-link   | dist        | 0.300        | <b>0.440</b> | 0.438        | 0.300        |
| DIANA         | dist        | 0.025        | 0.073        | <b>0.130</b> | NA           |
| DIANA         | corr        | -0.127       | 0.099        | <b>0.123</b> | NA           |

### Cluster Stability: with respect to synthetic re-measured data

Each entry shows the average adjusted Rand index of the clusters on the original data with clusters from the synthetic re-measured data sets. The maximum average adjusted Rand index for each row is shown in bold. The rows are sorted in descending order of the maximum average adjusted Rand index.

| algorithm     | sim measure | average      | SD-weighted  | CV-weighted  | hierarchical |
|---------------|-------------|--------------|--------------|--------------|--------------|
| MCLUST        | NA          | <b>0.993</b> | NA           | NA           | 0.982        |
| average-link  | dist        | 0.935        | <b>0.953</b> | 0.935        | 0.866        |
| centroid-link | dist        | <b>0.940</b> | 0.930        | <b>0.940</b> | <b>0.940</b> |
| k-means       | dist        | <b>0.932</b> | 0.910        | 0.898        | NA           |
| complete-link | dist        | 0.882        | <b>0.925</b> | 0.904        | 0.367        |
| centroid-link | corr        | <b>0.915</b> | 0.766        | 0.915        | 0.915        |
| average-link  | corr        | <b>0.902</b> | 0.801        | 0.821        | 0.893        |
| k-means       | corr        | 0.749        | 0.740        | <b>0.786</b> | NA           |
| complete-link | corr        | <b>0.693</b> | 0.630        | 0.589        | 0.504        |

## Results on completely synthetic data

### Cluster Accuracy: different numbers of simulated repeated measurements and different noise levels

Each entry shows the average adjusted Rand index of the corresponding algorithm with the 6 classes (average over 5 sets of completely synthetic data). For each number of simulated repeated measurements and noise level, the most accurate result is shown in bold. Since the modified SD-weighted approach only makes sense for distance, the results are not available (NA) for correlation.

| algorithm     | # rep | noise | sim measure |              | modified    |                  |              |
|---------------|-------|-------|-------------|--------------|-------------|------------------|--------------|
|               |       |       | or model    | average      | SD-weighted | SD-weighted dist | IMM          |
| average-link  | 1     | lo    | corr        | 0.680        | NA          | NA               | NA           |
| average-link  | 1     | lo    | dist        | 0.789        | NA          | NA               | NA           |
| average-link  | 1     | lo    | spherical   | NA           | NA          | NA               | 0.804        |
| average-link  | 1     | lo    | elliptical  | NA           | NA          | NA               | 0.804        |
| complete-link | 1     | lo    | corr        | 0.679        | NA          | NA               | NA           |
| complete-link | 1     | lo    | dist        | <b>0.831</b> | NA          | NA               | NA           |
| complete-link | 1     | lo    | spherical   | NA           | NA          | NA               | 0.428        |
| complete-link | 1     | lo    | elliptical  | NA           | NA          | NA               | 0.428        |
| average-link  | 1     | hi    | corr        | 0.259        | NA          | NA               | NA           |
| average-link  | 1     | hi    | dist        | 0.000        | NA          | NA               | NA           |
| average-link  | 1     | hi    | spherical   | NA           | NA          | NA               | <b>0.395</b> |
| average-link  | 1     | hi    | elliptical  | NA           | NA          | NA               | <b>0.395</b> |
| complete-link | 1     | hi    | corr        | 0.252        | NA          | NA               | NA           |
| complete-link | 1     | hi    | dist        | 0.053        | NA          | NA               | NA           |
| complete-link | 1     | hi    | spherical   | NA           | NA          | NA               | 0.214        |
| complete-link | 1     | hi    | elliptical  | NA           | NA          | NA               | 0.214        |
| average-link  | 4     | lo    | corr        | 0.764        | 0.576       | NA               | NA           |
| average-link  | 4     | lo    | dist        | 0.877        | 0.927       | 0.962            | NA           |
| average-link  | 4     | lo    | spherical   | NA           | NA          | NA               | 0.926        |
| average-link  | 4     | lo    | elliptical  | NA           | NA          | NA               | <b>0.957</b> |
| complete-link | 4     | lo    | corr        | 0.755        | 0.584       | NA               | NA           |
| complete-link | 4     | lo    | dist        | 0.925        | 0.876       | 0.992            | NA           |
| complete-link | 4     | lo    | spherical   | NA           | NA          | NA               | 0.897        |
| complete-link | 4     | lo    | elliptical  | NA           | NA          | NA               | <b>0.957</b> |
| average-link  | 4     | hi    | corr        | 0.389        | 0.519       | NA               | NA           |
| average-link  | 4     | hi    | dist        | 0.000        | 0.713       | 0.831            | NA           |
| average-link  | 4     | hi    | spherical   | NA           | NA          | NA               | 0.589        |
| average-link  | 4     | hi    | elliptical  | NA           | NA          | NA               | <b>0.911</b> |
| complete-link | 4     | hi    | corr        | 0.450        | 0.518       | NA               | NA           |
| complete-link | 4     | hi    | dist        | 0.498        | 0.798       | 0.871            | NA           |
| complete-link | 4     | hi    | spherical   | NA           | NA          | NA               | 0.559        |
| complete-link | 4     | hi    | elliptical  | NA           | NA          | NA               | 0.910        |
| average-link  | 20    | lo    | corr        | 0.854        | 0.701       | NA               | NA           |
| average-link  | 20    | lo    | dist        | 0.891        | 0.964       | <b>1.000</b>     | NA           |
| average-link  | 20    | lo    | spherical   | NA           | NA          | NA               | 0.962        |
| average-link  | 20    | lo    | elliptical  | NA           | NA          | NA               | 0.957        |
| complete-link | 20    | lo    | corr        | 0.809        | 0.675       | NA               | NA           |
| complete-link | 20    | lo    | dist        | 0.890        | 0.999       | <b>1.000</b>     | NA           |
| complete-link | 20    | lo    | spherical   | NA           | NA          | NA               | 0.872        |
| complete-link | 20    | lo    | elliptical  | NA           | NA          | NA               | 0.954        |
| average-link  | 20    | hi    | corr        | 0.602        | 0.651       | NA               | NA           |
| average-link  | 20    | hi    | dist        | 0.590        | 0.819       | <b>0.961</b>     | NA           |
| average-link  | 20    | hi    | spherical   | NA           | NA          | NA               | 0.688        |
| average-link  | 20    | hi    | elliptical  | NA           | NA          | NA               | 0.953        |
| complete-link | 20    | hi    | corr        | 0.608        | 0.690       | NA               | NA           |
| complete-link | 20    | hi    | dist        | 0.710        | 0.920       | 0.960            | NA           |
| complete-link | 20    | hi    | spherical   | NA           | NA          | NA               | 0.854        |
| complete-link | 20    | hi    | elliptical  | NA           | NA          | NA               | 0.957        |

### Cluster Stability: at low noise levels

Each entry shows the average adjusted Rand index of the clusters on the original data with clusters from the synthetic re-measured data sets.

| alg           | # rep | sim  | avg over replicates | SD-weighted  | CV-weighted  |
|---------------|-------|------|---------------------|--------------|--------------|
| average-link  | 1     | corr | 0.977               | NA           | NA           |
| average-link  | 1     | dist | 0.945               | NA           | NA           |
| complete-link | 1     | corr | 0.892               | NA           | NA           |
| complete-link | 1     | dist | 0.868               | NA           | NA           |
| centroid-link | 1     | corr | 0.980               | NA           | NA           |
| centroid-link | 1     | dist | 0.948               | NA           | NA           |
| k-means       | 1     | corr | 0.979               | NA           | NA           |
| k-means       | 1     | dist | 0.941               | NA           | NA           |
| average-link  | 4     | corr | <b>0.958</b>        | 0.832        | 0.854        |
| average-link  | 4     | dist | 0.970               | <b>0.998</b> | <b>0.998</b> |
| complete-link | 4     | corr | <b>0.947</b>        | 0.580        | 0.671        |
| complete-link | 4     | dist | 0.968               | 0.923        | <b>0.981</b> |
| centroid-link | 4     | corr | <b>0.959</b>        | 0.861        | 0.866        |
| centroid-link | 4     | dist | 0.984               | <b>0.998</b> | 0.986        |
| k-means       | 4     | corr | <b>0.958</b>        | 0.693        | 0.634        |
| k-means       | 4     | dist | 0.954               | <b>0.998</b> | 0.967        |
| average-link  | 20    | corr | <b>0.978</b>        | 0.962        | 0.947        |
| average-link  | 20    | dist | 0.958               | <b>0.999</b> | <b>0.999</b> |
| complete-link | 20    | corr | <b>0.972</b>        | 0.735        | 0.783        |
| complete-link | 20    | dist | 0.936               | 0.973        | <b>0.999</b> |
| centroid-link | 20    | corr | <b>0.978</b>        | 0.975        | 0.903        |
| centroid-link | 20    | dist | 0.965               | 0.992        | <b>0.999</b> |
| k-means       | 20    | corr | <b>0.978</b>        | 0.870        | 0.706        |
| k-means       | 20    | dist | 0.958               | 0.995        | <b>0.996</b> |

## Lung cancer data

Bhattacharjee *et al.* [2] studied the variation of expression levels in lung tumor tissue samples over 12600 transcript sequences using Affymetrix oligonucleotide arrays. On Affymetrix arrays, 11-20 probe pairs of short sequences are used to interrogate each target gene. In other words, these probe pairs measure the expression levels of different portions of the same gene, and hence provide a form of repeated information. Many statistics have been proposed to summarize the expression levels of genes from measured intensities of probe pairs, for example, [3], [4], [5], [6]. Some of these statistics also provide estimated standard errors of expression levels. We treat these standard errors as variability estimates of expression levels. In particular, we used the AvLog(PM-BG) statistic and the corresponding standard errors from Irizarry *et al.* [6]. There are 254 experiments on five types of tissue samples, including lung adenocarcinomas, pulmonary carcinoids, squamous cell lung carcinomas, small-cell lung carcinomas, and normal lung specimens. Our goal is to cluster the experiments, and these five tissue types form our external knowledge. We used a subset of approximately 800 probe sets which have high reproducibility across the adenocarcinoma samples [2].

## Results on the lung cancer data

### Cluster Accuracy: agreement with the 5 tissue types

Table 4 shows selected results of the adjusted Rand indices of comparing clustering results on the lung cancer data to the five tissue types. We produced five clusters using various clustering algorithms with both correlation and distance. In the “AvLog(PM-BG)” column, we used the AvLog(PM-BG) statistic [6] in computing similarity measures. In the “SE-weighted” column, we used the AvLog(PM-BG) statistic and the associated standard error (SE) [6] in computing

variability-weighted similarity measures. The SE-weighted approach produced more accurate clusters in 4 out of 6 cases (except when average-link and centroid-link are applied with correlation).

| algorithm     | sim measure | AvLog(PM-BG) | SE-weighted AvLog(PM-BG) |
|---------------|-------------|--------------|--------------------------|
| average-link  | corr        | <b>0.414</b> | 0.402                    |
| centroid-link | corr        | <b>0.399</b> | 0.368                    |
| centroid-link | dist        | 0.366        | <b>0.376</b>             |
| average-link  | dist        | 0.275        | <b>0.372</b>             |
| complete-link | dist        | 0.098        | <b>0.354</b>             |
| complete-link | corr        | 0.232        | <b>0.299</b>             |

### Cluster Stability: varying numbers of replicates

Each entry shows the average adjusted Rand index of the clusters on the original data with clusters from the synthetic re-measured data sets with different numbers of replicates

| alg           | sim  | 4 rep        |              | 10 rep       |              | 20 rep       |              |
|---------------|------|--------------|--------------|--------------|--------------|--------------|--------------|
|               |      | avg over rep | SD-weighted  | avg over rep | SD-weighted  | avg over rep | SD-weighted  |
| average-link  | corr | <b>0.784</b> | 0.071        | <b>0.869</b> | 0.854        | 0.875        | <b>0.974</b> |
| average-link  | dist | <b>0.946</b> | 0.553        | <b>0.948</b> | 0.721        | <b>1.000</b> | 0.828        |
| complete-link | corr | <b>0.750</b> | 0.118        | <b>0.588</b> | 0.377        | <b>0.720</b> | 0.484        |
| complete-link | dist | 0.409        | <b>0.464</b> | <b>0.553</b> | 0.479        | 0.576        | 0.575        |
| centroid-link | corr | <b>0.979</b> | 0.028        | <b>1.000</b> | 0.082        | <b>1.000</b> | 0.770        |
| centroid-link | dist | <b>0.960</b> | 0.867        | 0.975        | <b>0.981</b> | 0.960        | <b>0.967</b> |
| k-means       | corr | 0.969        | NA           | 0.996        | NA           | 0.996        | NA           |
| k-means       | dist | 0.944        | NA           | 0.961        | NA           | 0.993        | NA           |

## References

1. KY Yeung, C Fraley, A Murua, AE Raftery, WL Ruzzo: **Model-based clustering and data transformations for gene expression data**. *Bioinformatics* 2001, **17**:977-987.
2. A Bhattacharjee, WG Richards, J Staunton, C Li, S Monti, P Vasa, C Ladd, J Beheshti, R Bueno, M Gillette, et al: **Classification of human lung carcinomas by mRNA expression profiling reveals distinct adenocarcinoma subclasses**. *Proceedings of the National Academy of Science USA* 2001, **98**:13790-13795.
3. Affymetrix: **Statistical Algorithms Reference Guide**. 2001.
4. C Li, WH Wong: **Model-based analysis of oligonucleotide arrays: Expression index computation and outlier detection**. *Proceedings of the National Academy of Science USA* 2001, **98**:31-36.
5. WJ Lemon, JTT Palatini, R Krahe, FA Wright: **Theoretical and experimental comparison of gene expression estimators for oligonucleotide arrays**. 2001.
6. RA Irizarry, B Hobbs, F Collin, YD Beazer-Barclay, KJ Antonellis, U Scherf, TP Speed: **Exploration, Normalization, and Summaries of High Density Oligonucleotide Array Probe Level Data**. 2002.
